# Supplementary material
Source: PubMed Central journal article supplement (PMC6200642)
Supplement: NIHMS1505672-supplement-1.pdf [file NIHMS1505672-supplement-1.pdf]

## Supplementary Figure 1

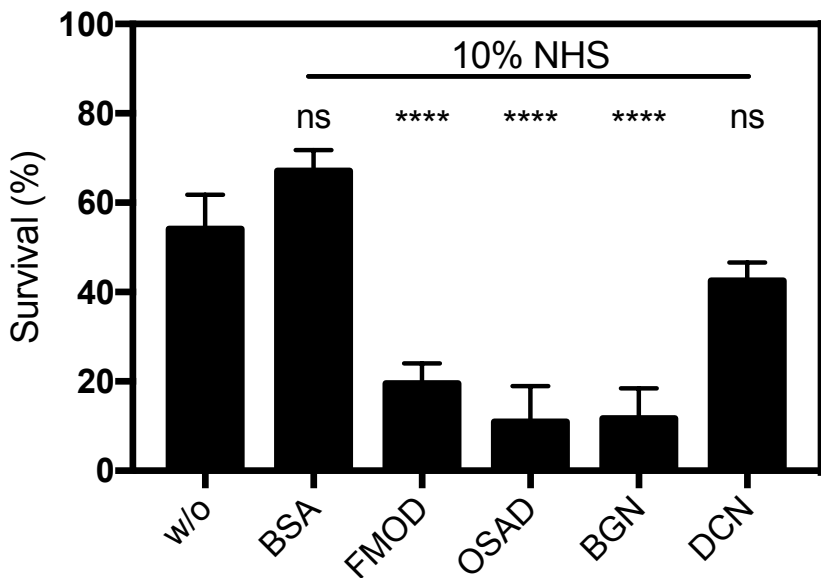

### Figure S1. Removal of excess SLRPs does not impede serum killing

Serum killing of strain RH4 following washing of bacterial-SLRP solution after 30 min incubation, removing unbound SLRPs. Survival is calculated as the percentage of colony-forming units (CFU) at 30 min to time 0. Error bars represent SD of three independent experiments. 50 µg/ml BSA was used as a negative protein control. Statistical differences were calculated using a one-way ANOVA with Dunnett's posttest versus bacteria without SLRPs. \*\*\*\*  $p < 0.0001$ .

# Supplementary Figure 2

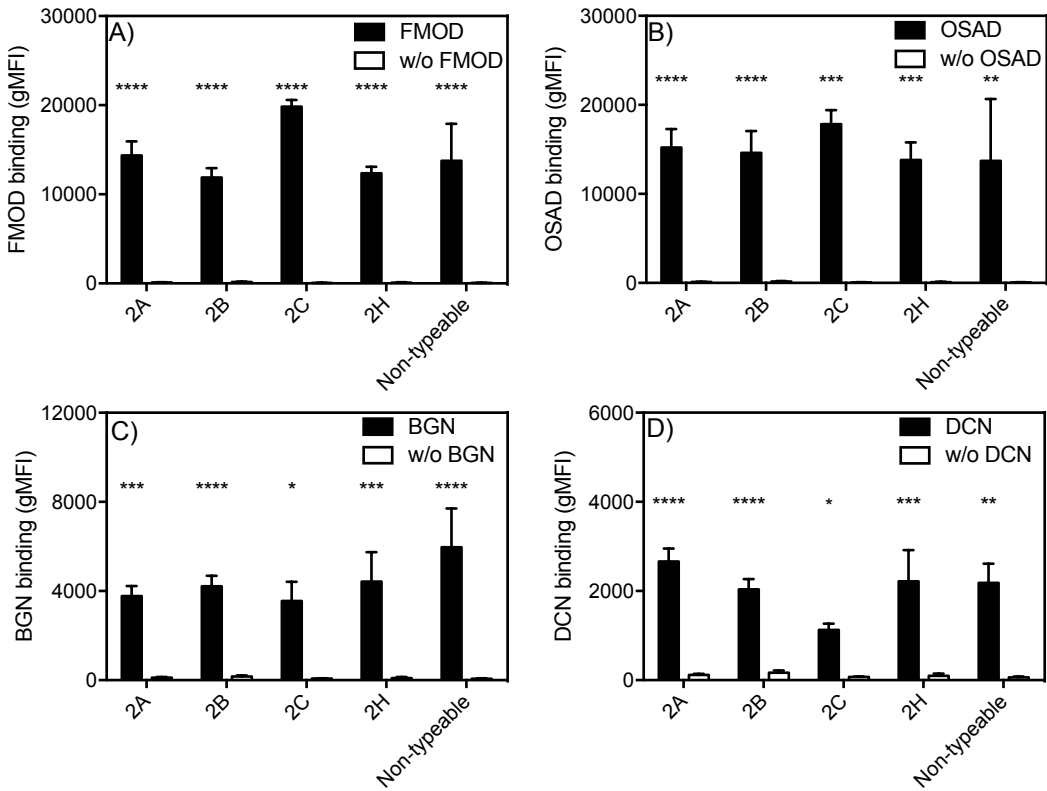

**Figure S2. *M. catarrhalis* isolates of different N-terminal repeats (NTER) of head domains bind SLRPs in similar fashion**

The SLRP binding capacities of *M. catarrhalis* clinical isolates expressing UspA2/2H were grouped according to their N-terminal repeat (NTER) domain; 2A, 2B, 2C, and 2H, and non-typeable. No significant difference in binding to SLRPs was observed between NTER groups and all NTER groups bound SLRPs in a statistically significant manner. Statistical differences were calculated using a one-way ANOVA with Dunnett's posttest. \*  $p < 0.05$ , \*\*  $p < 0.01$ , \*\*\*  $p < 0.001$ , \*\*\*\*  $p < 0.0001$ .

## Supplementary Figure 3

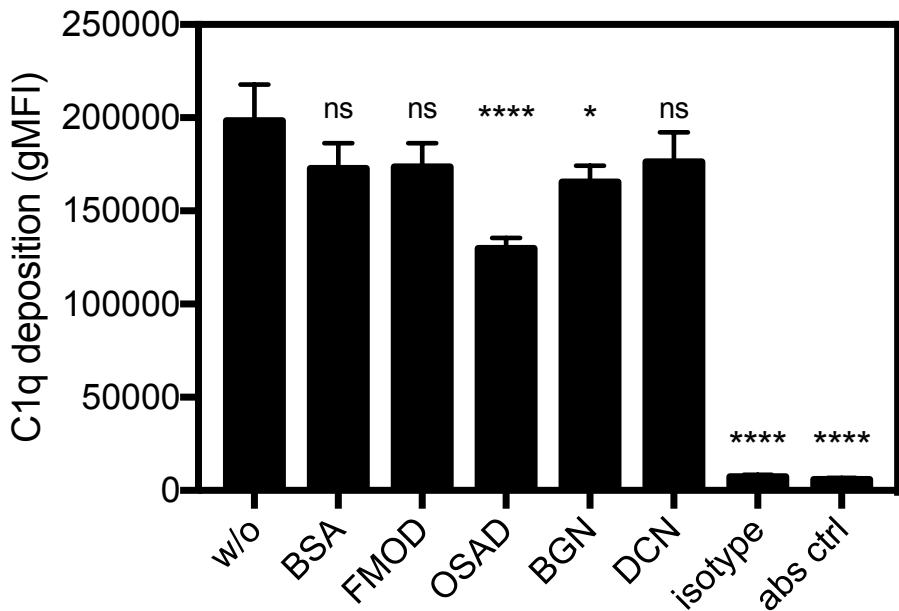

**Figure S3. OSAD and BGN significantly reduce C1q binding on *M. catarrhalis***

Deposition of C1q on the surface of *M. catarrhalis* was analysed by flow cytometry using 1% OmCI-treated serum. Data illustrates the mean and SD of three independent experiments. Statistical differences were calculated using a one-way ANOVA with Dunnett's posttest. \*  $p < 0.05$ , \*\*\*\*  $p < 0.0001$ .

## Supplementary Figure 4

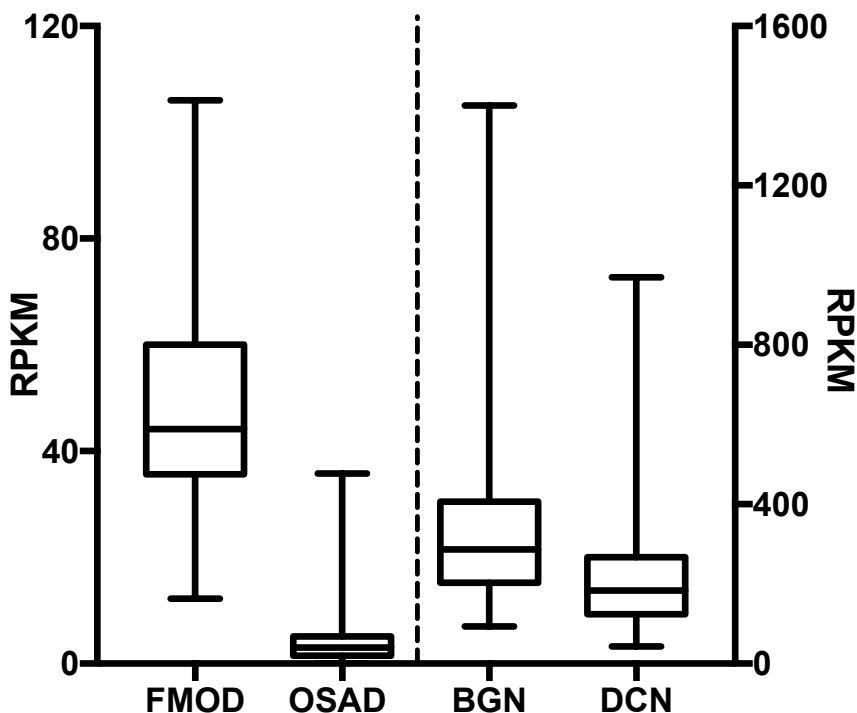

### Figure S4. SLRP RNA expression from lung tissue

RNA expression of SLRPs from lung tissue samples (n=320) adapted from the Human Protein Atlas program ([www.proteinatlas.org](http://www.proteinatlas.org)) (32). RNA sequencing data is reported in reads per kilobase per million mapped reads (RPKM).
